# Supplementary material for: Recent de novo origin of human protein-coding genes
Source: HighWire-hosted journal article supplement (doi:10.1101/gr.095026.109), 2009-09-02
Supplement: FigS1.pdf [file FigS1.pdf]

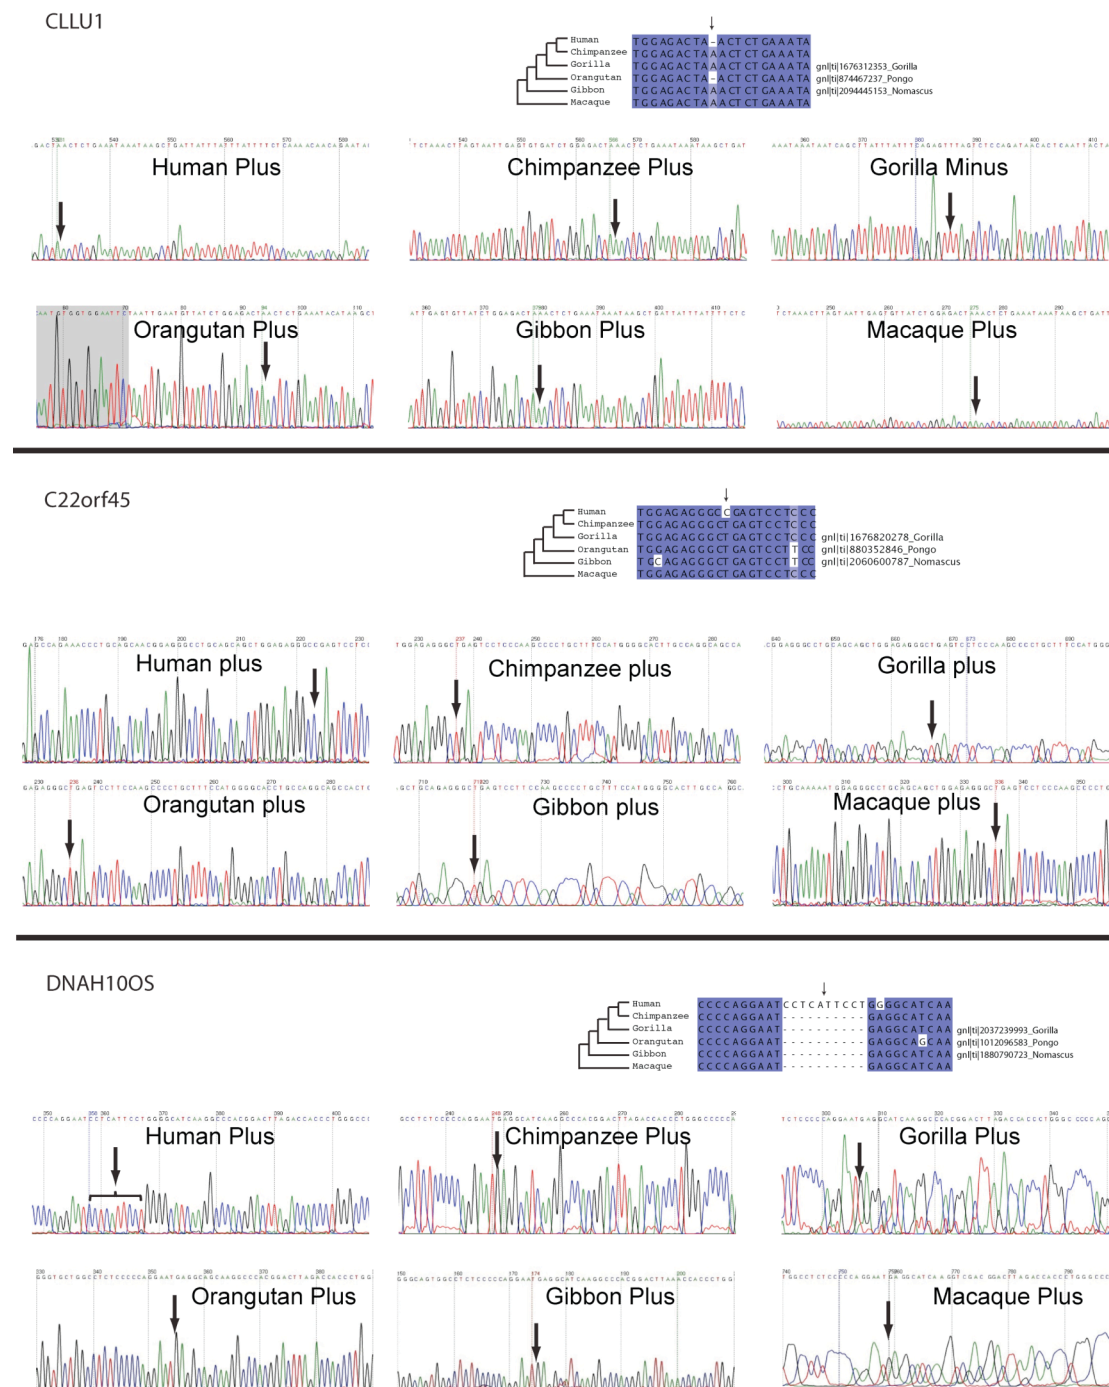

**Shared disablers between primates.** Three panels show details of alignments between coding sequence of human novel protein-coding genes and similar nucleotide sequences from the syntenic regions in chimp, and macaque and sequence traces from gorilla, gibbon and orangutan. For gorilla, gibbon and orangutan the trace database accession number is shown. Each alignment detail is centred on the shared disabler. The bottom of each panel shows the NCBI sequence traces from each organism for the plus strand (or minus strand when the plus strand was unavailable) which indicate unambiguous sequence in all cases.
